# Supplementary material for: Lime and Gypsum Rates Effects in New Soybean Areas in the Cerrado of Matopiba, Brazil
Source: MDPI journal article supplement (doi:10.3390/agriculture14071034), 2024-06-28
Supplement: s1 [file Figure S.pdf › Figure S.pdf]

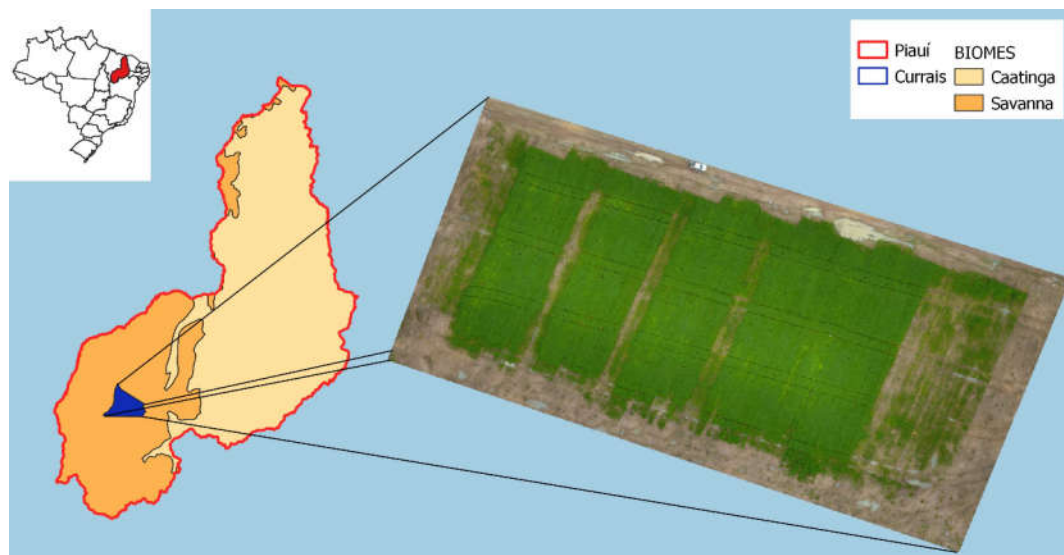

Figure S1. Experimental area at União Farm, Currais, Piauí, Brazil.

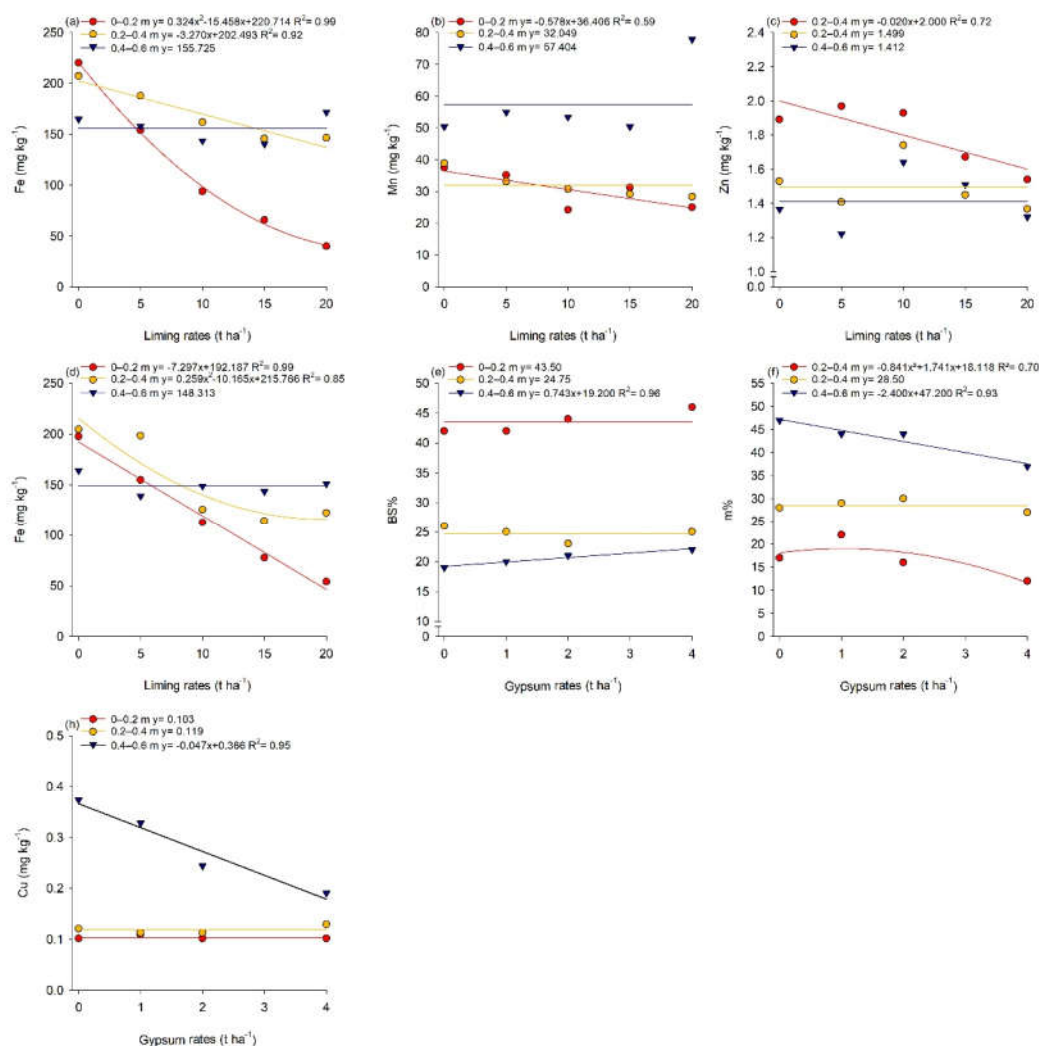

Figure S2: Data referring to Fe (a), Mn (b) and Zn (c) as a function of liming rates (e) and V (f) as a function of gypsum rates in the 2019/2020 cropping season, Fe (d) as a function of liming rates and Cu (g) as a function of gypsum rates in the 2020/2021 cropping season. Currais, Piauí, Brazil.

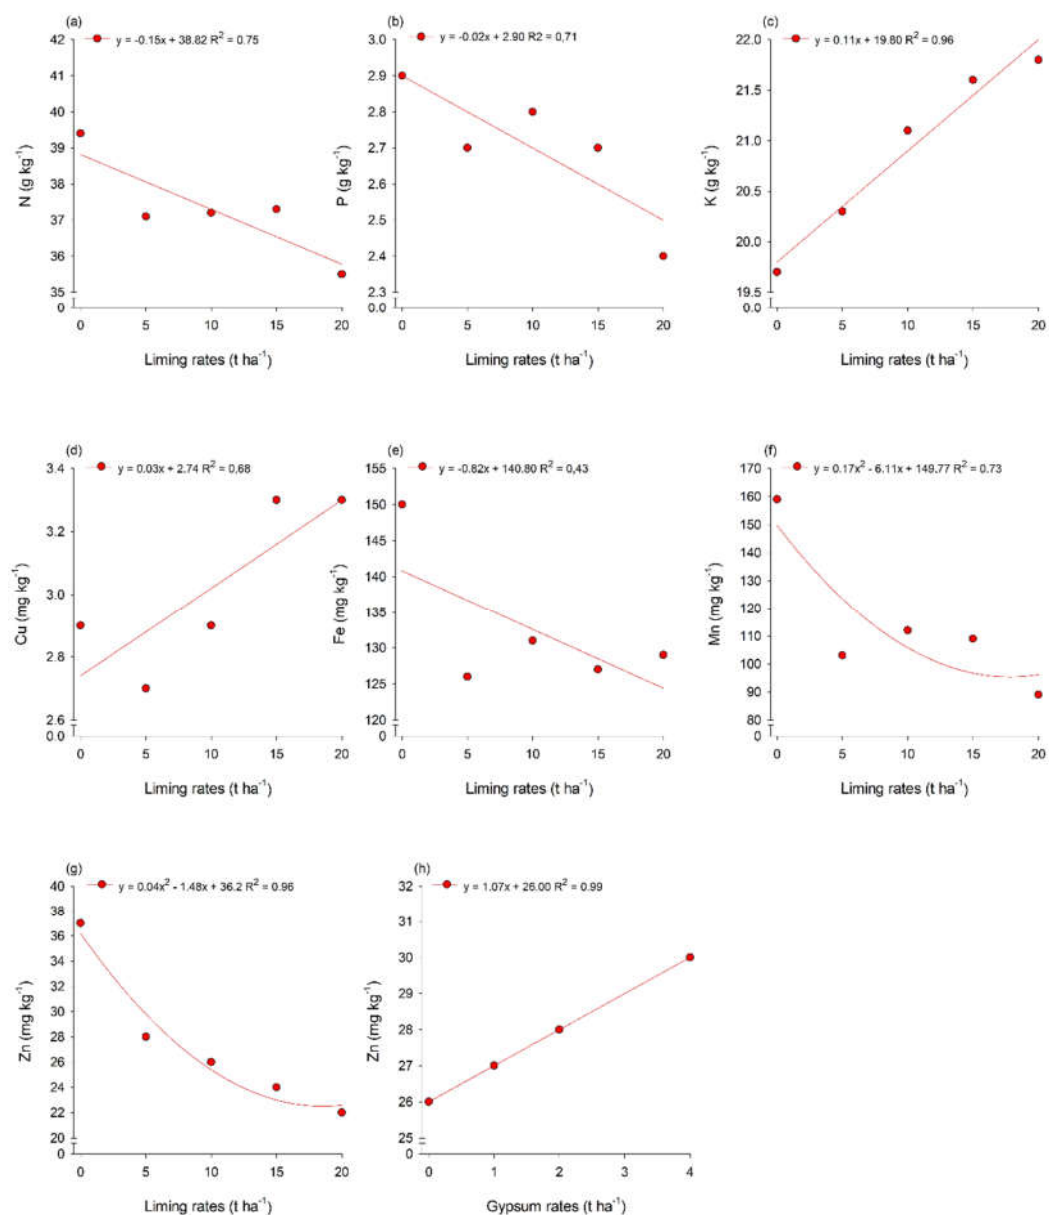

Figure S3: Leaf concentrations of N (a), P (b), K (c), Cu (d), Fe (e), Mn (f) and Zn (g) as a function of liming rates and of Zn (h) as a function of gypsum rates in soybean, in the 2019/2020 agricultural year. Currais, Piauí, Brazil.

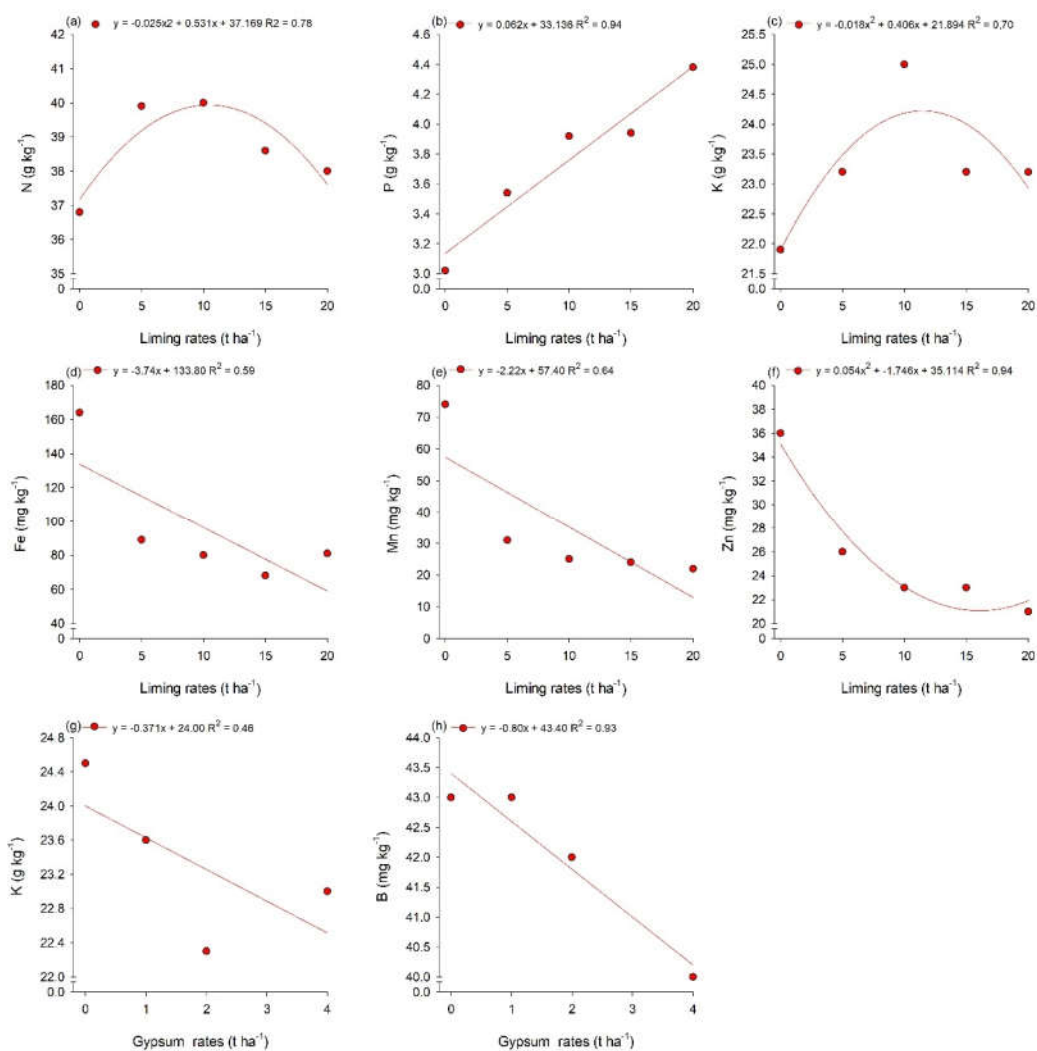

Figure S4: Leaf concentrations of N (a), P (b), K (c), Mn (e), Fe (f) and Zn (g) as a function of liming rates and of K (g) and B (h) as a function of gypsum rates in soybean, in the 2020/2021 cropping season. Currais, Piauí, Brazil.
