# Supplementary material for: Lime and Gypsum Rates Effects in New Soybean Areas in the Cerrado of Matopiba, Brazil
Source: MDPI journal article supplement (doi:10.3390/agriculture14071034), 2024-06-28
Supplement: s1 [file Table S.pdf › Table S.pdf]

Table S1. Average values, F test and coefficient of variation (CV) for soil chemical attributes (0.0-0.2 m) as a function of different liming and gypsum rates in soybean (2019/2020 cropping season) in a Cerrado area. Currais, Piauí, Brazil.

| Liming (t ha <sup>-1</sup> ) | pH                | pH               | TOC                | P                       | K     | Ca   | Mg   | Al                                 | H+Al | SB   | CEC  | V     | m     | Na   | S-SO <sub>4</sub> <sup>2-</sup> | B    | Cu   | Fe     | Mn    | Zn   |
|------------------------------|-------------------|------------------|--------------------|-------------------------|-------|------|------|------------------------------------|------|------|------|-------|-------|------|---------------------------------|------|------|--------|-------|------|
|                              | CaCl <sub>2</sub> | H <sub>2</sub> O | g Kg <sup>-1</sup> | - mg Kg <sup>-1</sup> - |       |      |      | ----- cmolc Kg <sup>-1</sup> ----- |      |      |      | - % - |       |      | ----- mg Kg <sup>-1</sup> ----- |      |      |        |       |      |
| 0                            | 3.63              | 4.82             | 10.88              | 4.77                    | 38.28 | 0.13 | 0.05 | 0.50                               | 3.48 | 0.27 | 3.76 | 8     | 64.70 | 0.80 | 6.17                            | 0.27 | 0.10 | 220.31 | 37.50 | 1.89 |
| 5                            | 4.49              | 5.83             | 10.42              | 14.22                   | 38.28 | 0.68 | 0.38 | 0.20                               | 2.23 | 1.16 | 3.38 | 34    | 15.50 | 1.05 | 8.28                            | 0.23 | 0.10 | 153.91 | 35.16 | 1.97 |
| 10                           | 5.13              | 6.24             | 10.42              | 22.73                   | 44.53 | 1.02 | 0.63 | 0.04                               | 1.62 | 1.77 | 3.39 | 52    | 2.20  | 1.59 | 9.22                            | 0.23 | 0.10 | 93.75  | 24.22 | 1.93 |
| 15                           | 5.36              | 6.42             | 10.88              | 18.05                   | 42.97 | 1.28 | 0.71 | 0.00                               | 1.52 | 2.11 | 3.63 | 58    | 0.20  | 1.12 | 6.95                            | 0.25 | 0.11 | 65.63  | 31.25 | 1.67 |
| 20                           | 5.56              | 6.14             | 11.33              | 8.52                    | 37.50 | 1.44 | 0.84 | 0.00                               | 1.28 | 2.39 | 3.67 | 65    | 0.00  | 1.34 | 7.19                            | 0.25 | 0.10 | 39.84  | 25.00 | 1.54 |
| F test                       | **                | **               | ns                 | **                      | **    | **   | **   | **                                 | **   | **   | ns   | **    | **    | ns   | *                               | ns   | ns   | **     | *     | *    |
| Gypsum (t ha <sup>-1</sup> ) |                   |                  |                    |                         |       |      |      |                                    |      |      |      |       |       |      |                                 |      |      |        |       |      |
| 0                            | 4.81              | 5.89             | 10.88              | 13.28                   | 41.41 | 0.81 | 0.52 | 0.16                               | 2.05 | 1.45 | 3.49 | 42    | 17    | 1.43 | 5.78                            | 0.24 | 0.10 | 121.88 | 36.72 | 1.84 |
| 1                            | 4.79              | 5.81             | 10.88              | 11.88                   | 44.53 | 0.88 | 0.52 | 0.17                               | 2.09 | 1.52 | 3.59 | 42    | 22    | 1.06 | 6.64                            | 0.26 | 0.10 | 119.53 | 24.22 | 1.77 |
| 2                            | 4.89              | 5.93             | 11.33              | 16.33                   | 35.16 | 0.91 | 0.52 | 0.15                               | 1.99 | 1.54 | 3.53 | 44    | 16    | 1.18 | 8.05                            | 0.22 | 0.10 | 110.94 | 32.81 | 1.84 |
| 4                            | 4.85              | 5.83             | 10.88              | 13.28                   | 41.41 | 1.02 | 0.53 | 0.13                               | 1.98 | 1.66 | 3.64 | 46    | 12    | 1.05 | 9.69                            | 0.25 | 0.11 | 106.25 | 30.47 | 1.75 |
| F test                       | ns                | ns               | ns                 | ns                      | ns    | *    | ns   | ns                                 | ns   | *    | ns   | ns    | **    | ns   | **                              | ns   | ns   | ns     | ns    | ns   |
| C x G                        | ns                | ns               | ns                 | *                       | **    | ns   | ns   | ns                                 | ns   | ns   | ns   | ns    | **    | ns   | *                               | ns   | ns   | ns     | ns    | ns   |
| CV(%)                        | 5.4               | 5.97             | 16.3               | 39.2                    | 17.6  | 18.8 | 18.6 | 34.0                               | 19.1 | 15.5 | 10.1 | 14.4  | 19.6  | 55.0 | 36.4                            | 28.9 | 9.5  | 30.4   | 48.6  | 22.8 |

Ns, \* and \*\* - Non-significant, significant at 5 and at 1% of probability by the F test.

Table S2: Average values, F test and coefficient of variation (CV) for soil chemical attributes (0.2-0.4 m) as a function of different liming and gypsum rates in soybean (2019/2020 cropping season) in a Cerrado area. Currais, Piauí, Brazil.

| Liming (t ha <sup>-1</sup> ) | pH                | pH               | TOC                | P                       | K     | Ca   | Mg   | Al   | H+Al | SB   | CEC  | V    | m    | Na   | S-SO <sub>4</sub> <sup>2-</sup> | B    | Cu   | Fe     | Mn    | Zn   |
|------------------------------|-------------------|------------------|--------------------|-------------------------|-------|------|------|------|------|------|------|------|------|------|---------------------------------|------|------|--------|-------|------|
|                              | CaCl <sub>2</sub> | H <sub>2</sub> O | g Kg <sup>-1</sup> | - mg Kg <sup>-1</sup> - |       |      |      |      |      |      |      |      |      |      |                                 |      |      |        |       |      |
|                              |                   |                  |                    |                         |       |      |      |      |      |      |      |      |      |      |                                 |      |      |        |       |      |
| 0                            | 3.64              | 4.43             | 5.63               | 1.86                    | 12.14 | 0.25 | 0.06 | 0.39 | 2.58 | 0.35 | 2.95 | 12   | 52   | 0.53 | 11.69                           | 0.19 | 0.10 | 206.45 | 38.71 | 1.52 |
| 5                            | 3.88              | 4.63             | 5.63               | 1.94                    | 12.95 | 0.40 | 0.17 | 0.29 | 2.35 | 0.59 | 2.95 | 20   | 34   | 0.52 | 10.65                           | 0.17 | 0.11 | 187.10 | 33.06 | 1.40 |
| 10                           | 4.07              | 5.08             | 5.63               | 2.51                    | 12.95 | 0.54 | 0.27 | 0.24 | 2.09 | 0.83 | 2.92 | 29   | 23   | 0.56 | 11.94                           | 0.18 | 0.10 | 161.29 | 30.65 | 1.73 |
| 15                           | 4.24              | 5.21             | 6.10               | 2.02                    | 18.61 | 0.68 | 0.40 | 0.19 | 2.09 | 1.00 | 3.15 | 32   | 18   | 0.62 | 12.02                           | 0.18 | 0.11 | 145.16 | 29.03 | 1.44 |
| 20                           | 4.24              | 5.05             | 5.63               | 1.86                    | 14.57 | 0.64 | 0.38 | 0.19 | 2.06 | 0.99 | 3.10 | 32   | 16   | 0.52 | 11.29                           | 0.15 | 0.11 | 145.97 | 28.23 | 1.36 |
| F test                       | **                | *                | ns                 | ns                      | **    | **   | **   | **   | **   | **   | **   | **   | **   | ns   | ns                              | ns   | ns   | **     | ns    | ns   |
| Gypsum (t ha <sup>-1</sup> ) |                   |                  |                    |                         |       |      |      |      |      |      |      |      |      |      |                                 |      |      |        |       |      |
| 0                            | 4.04              | 4.95             | 5.63               | 2.19                    | 15.38 | 0.49 | 0.28 | 0.25 | 2.23 | 0.79 | 3.02 | 26   | 28   | 0.54 | 7.26                            | 0.19 | 0.11 | 188.71 | 37.90 | 1.59 |
| 1                            | 4.02              | 4.92             | 5.63               | 2.10                    | 15.38 | 0.48 | 0.23 | 0.25 | 2.22 | 0.74 | 2.95 | 25   | 29   | 0.59 | 12.58                           | 0.18 | 0.10 | 152.42 | 25.81 | 1.48 |
| 2                            | 4.01              | 4.91             | 6.10               | 2.02                    | 12.95 | 0.53 | 0.28 | 0.28 | 2.21 | 0.70 | 2.99 | 23   | 30   | 0.59 | 12.66                           | 0.16 | 0.10 | 156.45 | 33.06 | 1.41 |
| 4                            | 3.98              | 4.72             | 6.10               | 1.94                    | 14.57 | 0.52 | 0.25 | 0.26 | 2.27 | 0.78 | 3.10 | 25   | 27   | 0.49 | 13.63                           | 0.17 | 0.11 | 179.03 | 32.26 | 1.52 |
| F test                       | ns                | Ns               | ns                 | ns                      | ns    | ns   | ns   | ns   | ns   | ns   | ns   | ns   | ns   | ns   | **                              | ns   | ns   | ns     | ns    | ns   |
| C x G                        | ns                | ns               | ns                 | ns                      | ns    | ns   | ns   | ns   | ns   | ns   | ns   | ns   | ns   | ns   | ns                              | ns   | ns   | ns     | ns    | ns   |
| CV(%)                        | 3.8               | 6.28             | 13.0               | 37.5                    | 28.4  | 24.0 | 38.4 | 21.7 | 11.0 | 30.1 | 7.8  | 28.3 | 23.9 | 35.5 | 19.6                            | 19.9 | 16.7 | 23.3   | 42.4  | 31.8 |

Ns, \* and \*\* - Non-significant, Significant at 5 and at 1% of probability by the F test.

Table S3: Average values, F test and coefficient of variation (CV) for soil chemical attributes (0.4-0.6 m) as a function of different liming and gypsum rates in soybean (2019/2020 cropping season) in a Cerrado area. Currais, Piauí, Brazil.

| Liming (t ha <sup>-1</sup> ) | pH                | pH               | TOC                | P    | K                   | Ca                                 | Mg   | Al   | H+Al | SB   | CEC   | V   | m    | Na                              | S-SO <sub>4</sub> <sup>2-</sup> | B    | Cu   | Fe     | Mn    | Zn   |
|------------------------------|-------------------|------------------|--------------------|------|---------------------|------------------------------------|------|------|------|------|-------|-----|------|---------------------------------|---------------------------------|------|------|--------|-------|------|
|                              | CaCl <sub>2</sub> | H <sub>2</sub> O | g Kg <sup>-1</sup> | -    | mg Kg <sup>-1</sup> | ----- cmolc Kg <sup>-1</sup> ----- |      |      |      |      | - % - |     |      | ----- mg Kg <sup>-1</sup> ----- |                                 |      |      |        |       |      |
| 0                            | 3.79              | 4.09             | 4.12               | 1.76 | 15.27               | 0.17                               | 0.05 | 0.38 | 1.85 | 0.25 | 2.11  | 12  | 60   | 0.81                            | 11.30                           | 0.09 | 0.12 | 164.89 | 50.38 | 1.37 |
| 5                            | 3.88              | 4.24             | 4.16               | 1.76 | 16.03               | 0.21                               | 0.10 | 0.33 | 1.67 | 0.35 | 2.02  | 17  | 48   | 0.92                            | 10.53                           | 0.14 | 0.14 | 158.02 | 54.96 | 1.22 |
| 10                           | 3.97              | 4.38             | 4.65               | 1.60 | 14.50               | 0.27                               | 0.14 | 0.33 | 1.63 | 0.44 | 2.06  | 21  | 42   | 0.77                            | 12.98                           | 0.12 | 0.11 | 143.51 | 53.44 | 1.64 |
| 15                           | 4.11              | 4.57             | 4.96               | 1.76 | 12.98               | 0.34                               | 0.19 | 0.29 | 1.63 | 0.57 | 2.21  | 26  | 34   | 0.84                            | 13.82                           | 0.18 | 0.11 | 140.46 | 50.38 | 1.51 |
| 20                           | 4.11              | 4.53             | 4.29               | 2.06 | 12.21               | 0.34                               | 0.21 | 0.28 | 1.56 | 0.59 | 2.16  | 28  | 32   | 0.86                            | 12.21                           | 0.15 | 0.14 | 171.76 | 77.86 | 1.32 |
| F test                       | **                | **               | ns                 | ns   | *                   | **                                 | **   | *    | *    | **   | ns    | **  | **   | ns                              | ns                              | ns   | ns   | ns     | ns    | ns   |
| Gypsum (t ha <sup>-1</sup> ) |                   |                  |                    |      |                     |                                    |      |      |      |      |       |     |      |                                 |                                 |      |      |        |       |      |
| 0                            | 3.98              | 4.45             | 4.34               | 1.68 | 14.50               | 0.24                               | 0.12 | 0.34 | 1.70 | 0.40 | 2.11  | 19  | 47   | 0.86                            | 9.01                            | 0.16 | 0.13 | 159.54 | 58.02 | 1.33 |
| 1                            | 3.98              | 4.35             | 4.34               | 1.68 | 14.50               | 0.25                               | 0.14 | 0.32 | 1.66 | 0.43 | 2.08  | 20  | 44   | 0.83                            | 11.37                           | 0.15 | 0.13 | 150.38 | 47.33 | 1.50 |
| 2                            | 3.96              | 4.34             | 4.34               | 1.68 | 13.74               | 0.25                               | 0.14 | 0.34 | 1.62 | 0.43 | 2.05  | 21  | 44   | 0.83                            | 12.67                           | 0.14 | 0.11 | 154.96 | 58.02 | 1.54 |
| 4                            | 3.99              | 4.31             | 4.74               | 1.91 | 15.27               | 0.32                               | 0.15 | 0.29 | 1.70 | 0.51 | 2.21  | 22  | 37   | 0.83                            | 15.65                           | 0.15 | 0.12 | 158.02 | 67.18 | 1.29 |
| F test                       | ns                | ns               | ns                 | ns   | ns                  | **                                 | ns   | ns   | ns   | *    | ns    | *   | *    | ns                              | **                              | ns   | ns   | ns     | ns    | ns   |
| C x G                        | ns                | ns               | ns                 | ns   | ns                  | ns                                 | ns   | ns   | ns   | ns   | ns    | ns  | ns   | ns                              | ns                              | ns   | ns   | ns     | ns    | ns   |
| CV(%)                        | 2.9               | 3.5              | 26.6               | 24.4 | 23.1                | 27.7                               | 35.0 | 29.7 | 13.8 | 25.4 | 12.4  | 2.2 | 21.6 | 26.7                            | 28.4                            | 43.4 | 33.9 | 27.3   | 34.1  | 41.6 |

Ns, \* and \*\* - Non-significant, significant at 5 and at 1% of probability by the F test.

Table S4: Average values, F test and coefficient of variation (CV) for soil chemical attributes (0.0-0.2 m) as a function of different liming and gypsum rates in soybean (2020/2021 cropping season) in a Cerrado area. Currais, Piauí, Brazil.

| Liming (t ha <sup>-1</sup> ) | pH                | pH               | TOC                | P                     | K     | Ca   | Mg   | Al                     | H+Al | SB   | CEC  | V   | m    | Na   | S-SO <sub>4</sub> <sup>2-</sup> | B                   | Cu   | Fe     | Mn    | Zn   |
|------------------------------|-------------------|------------------|--------------------|-----------------------|-------|------|------|------------------------|------|------|------|-----|------|------|---------------------------------|---------------------|------|--------|-------|------|
|                              | CaCl <sub>2</sub> | H <sub>2</sub> O | g Kg <sup>-1</sup> | - mg Kg <sup>-1</sup> | -     |      |      | cmolc Kg <sup>-1</sup> |      |      |      |     | - %  |      |                                 | mg Kg <sup>-1</sup> |      |        |       |      |
| 0                            | 3.65              | 4.36             | 9.97               | 7.58                  | 31.25 | 0.20 | 0.09 | 0.69                   | 3.21 | 1.11 | 4.34 | 26  | 39   | 0.52 | 2.42                            | 0.30                | 0.10 | 197.66 | 46.09 | 1.72 |
| 5                            | 4.61              | 5.23             | 10.88              | 8.83                  | 32.03 | 0.97 | 0.52 | 0.16                   | 2.27 | 2.33 | 4.60 | 50  | 7    | 0.44 | 3.20                            | 0.30                | 0.10 | 154.69 | 52.34 | 1.41 |
| 10                           | 5.1               | 6.03             | 10.88              | 9.45                  | 39.06 | 1.23 | 0.66 | 0.09                   | 1.74 | 2.92 | 4.67 | 62  | 2.9  | 0.62 | 3.36                            | 0.28                | 0.10 | 112.50 | 50.00 | 1.72 |
| 15                           | 5.5               | 6.45             | 10.88              | 11.41                 | 43.75 | 1.52 | 0.93 | 0.00                   | 1.34 | 3.58 | 4.91 | 73  | 0.1  | 0.49 | 3.91                            | 0.31                | 0.10 | 77.34  | 46.88 | 1.56 |
| 20                           | 5.63              | 6.73             | 11.33              | 9.77                  | 39.06 | 1.54 | 0.86 | 0.02                   | 1.08 | 3.41 | 4.49 | 76  | 0.5  | 0.63 | 3.05                            | 0.28                | 0.11 | 53.91  | 45.31 | 1.33 |
| F test                       | **                | **               | ns                 | *                     | **    | **   | **   | **                     | **   | **   | **   | **  | **   | ns   | *                               | ns                  | ns   | **     | ns    | ns   |
| Gypsum (t ha <sup>-1</sup> ) |                   |                  |                    |                       |       |      |      |                        |      |      |      |     |      |      |                                 |                     |      |        |       |      |
| 0                            | 4.93              | 5.73             | 10.88              | 8.67                  | 40.63 | 1.08 | 0.63 | 0.17                   | 1.84 | 2.78 | 4.62 | 59  | 9.5  | 0.49 | 3.20                            | 0.32                | 0.10 | 96.88  | 53.91 | 1.56 |
| 1                            | 4.89              | 5.69             | 10.42              | 10.78                 | 37.50 | 1.03 | 0.62 | 0.23                   | 2.02 | 2.62 | 4.64 | 56  | 11.1 | 0.55 | 2.97                            | 0.27                | 0.11 | 126.56 | 44.53 | 1.48 |
| 2                            | 4.95              | 5.89             | 10.88              | 10.00                 | 32.03 | 1.14 | 0.63 | 0.19                   | 1.88 | 2.62 | 4.49 | 58  | 9.6  | 0.59 | 2.97                            | 0.30                | 0.10 | 130.47 | 42.97 | 1.48 |
| 4                            | 4.84              | 5.72             | 10.88              | 8.05                  | 37.50 | 1.10 | 0.57 | 0.18                   | 1.98 | 2.66 | 4.64 | 57  | 9.5  | 0.52 | 3.67                            | 0.29                | 0.10 | 123.44 | 53.13 | 1.64 |
| F test                       | ns                | ns               | ns                 | ns                    | ns    | ns   | ns   | ns                     | ns   | ns   | ns   | ns  | ns   | ns   | ns                              | ns                  | ns   | ns     | ns    | ns   |
| C x G                        | ns                | ns               | ns                 | ns                    | ns    | ns   | ns   | ns                     | ns   | ns   | ns   | ns  | ns   | ns   | ns                              | ns                  | ns   | ns     | ns    | ns   |
| CV(%)                        | 5.3               | 5.6              | 11.9               | 40.2                  | 25.8  | 19.1 | 18.3 | 41.2                   | 20.5 | 15.8 | 11.5 | 9.9 | 52.1 | 35.2 | 38.9                            | 31.0                | 17.3 | 34.1   | 44.6  | 28.5 |

Ns, \* and \*\* - Non-significant, significant at 5 and at 1% of probability by the F test. Obs.: Data of aluminum were square root transformed.

Table S5: Average values, F test and coefficient of variation (CV) for soil chemical attributes (0.2-0.4 m) as a function of different liming and gypsum rates in soybean (2020/2021 cropping season) in a Cerrado area. Currais, Piauí, Brazil.

| Liming (t ha <sup>-1</sup> ) | pH                | pH               | TOC                | P                       | K     | Ca                                 | Mg   | Al   | H+Al | SB   | CEC  | V     | m    | Na   | S-SO <sub>4</sub> <sup>2-</sup> | B    | Cu   | Fe     | Mn     | Zn   |
|------------------------------|-------------------|------------------|--------------------|-------------------------|-------|------------------------------------|------|------|------|------|------|-------|------|------|---------------------------------|------|------|--------|--------|------|
|                              | CaCl <sub>2</sub> | H <sub>2</sub> O | g Kg <sup>-1</sup> | - mg Kg <sup>-1</sup> - |       | ----- cmol. Kg <sup>-1</sup> ----- |      |      |      |      |      | - % - |      |      | ----- mg Kg <sup>-1</sup> ----- |      |      |        |        |      |
| 0                            | 3.61              | 3.79             | 9.39               | 6.31                    | 22.66 | 0.22                               | 0.10 | 0.44 | 2.43 | 0.37 | 2.80 | 13    | 54   | 0.68 | 6.29                            | 0.19 | 0.11 | 204.03 | 83.87  | 1.13 |
| 5                            | 4.02              | 4.25             | 8.45               | 4.37                    | 17.81 | 0.43                               | 0.28 | 0.24 | 2.14 | 0.76 | 2.90 | 26    | 26   | 0.63 | 6.53                            | 0.20 | 0.13 | 197.58 | 115.32 | 1.29 |
| 10                           | 4.45              | 4.61             | 8.45               | 5.34                    | 21.04 | 0.69                               | 0.54 | 0.17 | 1.74 | 1.29 | 3.03 | 42    | 14   | 0.59 | 4.52                            | 0.18 | 0.11 | 125.00 | 95.16  | 0.97 |
| 15                           | 4.65              | 4.82             | 9.39               | 4.05                    | 25.09 | 0.99                               | 0.69 | 0.11 | 1.60 | 1.75 | 3.35 | 51    | 8    | 0.56 | 4.60                            | 0.20 | 0.13 | 113.71 | 114.52 | 1.05 |
| 20                           | 4.74              | 4.81             | 9.39               | 5.18                    | 18.61 | 1.17                               | 0.77 | 0.06 | 1.58 | 1.99 | 3.57 | 54    | 5    | 0.77 | 4.27                            | 0.15 | 0.10 | 121.77 | 87.90  | 1.29 |
| F test                       | **                | **               | ns                 | ns                      | ns    | **                                 | **   | **   | **   | **   | **   | **    | **   | ns   | **                              | ns   | ns   | **     | ns     | ns   |
| Gypsum (t ha <sup>-1</sup> ) |                   |                  |                    |                         |       |                                    |      |      |      |      |      |       |      |      |                                 |      |      |        |        |      |
| 0                            | 4.26              | 4.47             | 8.92               | 4.05                    | 22.66 | 0.67                               | 0.47 | 0.22 | 1.94 | 1.20 | 3.14 | 36    | 22   | 0.62 | 4.27                            | 0.19 | 0.12 | 160.48 | 97.58  | 1.21 |
| 1                            | 4.26              | 4.54             | 9.39               | 5.26                    | 20.23 | 0.70                               | 0.50 | 0.23 | 1.89 | 1.25 | 3.14 | 37    | 24   | 0.70 | 5.56                            | 0.19 | 0.11 | 144.35 | 89.52  | 1.13 |
| 2                            | 4.3               | 4.51             | 8.45               | 4.69                    | 17.81 | 0.66                               | 0.44 | 0.17 | 1.75 | 1.15 | 2.90 | 38    | 21   | 0.62 | 6.45                            | 0.17 | 0.11 | 149.19 | 102.42 | 1.13 |
| 4                            | 4.39              | 4.30             | 9.86               | 6.07                    | 22.66 | 0.77                               | 0.51 | 0.19 | 2.02 | 1.33 | 3.34 | 38    | 18   | 0.65 | 4.76                            | 0.19 | 0.13 | 155.65 | 108.06 | 1.21 |
| F test                       | ns                | ns               | ns                 | ns                      | ns    | ns                                 | ns   | ns   | ns   | ns   | ns   | ns    | ns   | ns   | **                              | ns   | ns   | ns     | ns     | ns   |
| C x G                        | ns                | ns               | ns                 | ns                      | ns    | ns                                 | ns   | ns   | ns   | ns   | ns   | ns    | ns   | ns   | ns                              | ns   | ns   | ns     | ns     | ns   |
| CV(%)                        | 5.3               | 9.13             | 23.7               | 43.9                    | 33.8  | 38.3                               | 32.7 | 47.9 | 17.4 | 34.4 | 14.8 | 23.1  | 40.1 | 42.7 | 27.6                            | 26.4 | 33.9 | 32.6   | 33.4   | 20.1 |

Ns, \* and \*\* - Non-significant, significant at 5 and at 1% of probability by the F test.

Table S6: Average values, F test and coefficient of variation (CV) for soil chemical attributes (0.4-0.6 m) as a function of different liming and gypsum rates in soybean (2019/2020 cropping season) in a Cerrado area. Currais, Piauí, Brazil.

| Liming (t ha <sup>-1</sup> ) | pH                | pH               | TOC                | P                       | K     | Ca   | Mg   | Al   | H+Al | SB   | CEC  | V    | m    | Na   | S-SO <sub>4</sub> <sup>2-</sup> | B    | Cu   | Fe     | Mn     | Zn   |
|------------------------------|-------------------|------------------|--------------------|-------------------------|-------|------|------|------|------|------|------|------|------|------|---------------------------------|------|------|--------|--------|------|
|                              | CaCl <sub>2</sub> | H <sub>2</sub> O | g Kg <sup>-1</sup> | - mg Kg <sup>-1</sup> - |       |      |      |      |      |      |      |      |      |      |                                 |      |      |        |        |      |
|                              |                   |                  |                    |                         |       |      |      |      |      |      |      |      |      |      |                                 |      |      |        |        |      |
| 0                            | 3.67              | 3.79             | 4.43               | 1.53                    | 11.45 | 0.21 | 0.09 | 0.43 | 2.01 | 0.35 | 2.36 | 15   | 56   | 0.63 | 8.63                            | 0.19 | 0.30 | 164.12 | 106.11 | 1.37 |
| 5                            | 3.89              | 4.25             | 4.43               | 1.53                    | 12.21 | 0.32 | 0.18 | 0.31 | 1.69 | 0.52 | 2.21 | 23   | 38   | 0.69 | 9.77                            | 0.21 | 0.21 | 138.93 | 95.42  | 1.30 |
| 10                           | 4.05              | 4.61             | 4.43               | 1.68                    | 12.98 | 0.43 | 0.26 | 0.28 | 1.66 | 0.72 | 2.38 | 30   | 30   | 0.67 | 11.07                           | 0.21 | 0.32 | 148.85 | 105.34 | 1.45 |
| 15                           | 4.29              | 4.83             | 5.31               | 1.68                    | 16.03 | 0.60 | 0.37 | 0.19 | 1.68 | 1.01 | 2.69 | 37   | 17   | 0.51 | 10.61                           | 0.21 | 0.31 | 143.51 | 93.13  | 1.37 |
| 20                           | 4.43              | 4.82             | 4.87               | 1.68                    | 11.45 | 0.68 | 0.40 | 0.17 | 1.37 | 1.12 | 2.50 | 44   | 15   | 0.53 | 10.23                           | 0.18 | 0.29 | 151.15 | 122.90 | 1.60 |
| F test                       | **                | **               | ns                 | ns                      | ns    | **   | *    | **   | **   | **   | **   | **   | **   | ns   | ns                              | ns   | ns   | ns     | ns     | ns   |
| Gypsum (t ha <sup>-1</sup> ) |                   |                  |                    |                         |       |      |      |      |      |      |      |      |      |      |                                 |      |      |        |        |      |
| 0                            | 4.07              | 4.47             | 5.31               | 1.68                    | 13.74 | 0.44 | 0.28 | 0.27 | 1.63 | 0.76 | 2.39 | 31   | 30   | 0.68 | 7.40                            | 0.20 | 0.37 | 146.56 | 103.82 | 1.53 |
| 1                            | 4.08              | 4.55             | 4.43               | 1.60                    | 12.21 | 0.42 | 0.25 | 0.27 | 1.71 | 0.72 | 2.43 | 29   | 31   | 0.64 | 9.77                            | 0.21 | 0.33 | 148.85 | 96.18  | 1.37 |
| 2                            | 4.11              | 4.52             | 4.87               | 1.60                    | 11.45 | 0.48 | 0.25 | 0.25 | 1.72 | 0.77 | 2.49 | 30   | 30   | 0.63 | 11.76                           | 0.18 | 0.24 | 148.85 | 100.00 | 1.30 |
| 4                            | 4.02              | 4.30             | 4.87               | 1.83                    | 13.74 | 0.44 | 0.24 | 0.30 | 1.68 | 0.73 | 2.40 | 30   | 32   | 0.50 | 11.37                           | 0.21 | 0.19 | 151.91 | 116.79 | 1.53 |
| F test                       | ns                | ns               | ns                 | ns                      | ns    | ns   | ns   | ns   | ns   | ns   | ns   | ns   | ns   | ns   | **                              | ns   | **   | ns     | ns     | ns   |
| C x G                        | ns                | ns               | ns                 | ns                      | ns    | ns   | ns   | ns   | ns   | ns   | ns   | ns   | ns   | ns   | ns                              | ns   | ns   | ns     | ns     | ns   |
| CV(%)                        | 4.4               | 9.13             | 22.1               | 32.4                    | 33.3  | 35.3 | 40.8 | 22.7 | 15.6 | 35.2 | 13.8 | 25.3 | 24.5 | 44.3 | 28.2                            | 21.9 | 44.3 | 23.6   | 40.9   | 24.2 |

ns, \* and \*\* - Non-significant, significant at 5 and at 1% of probability by the F test.

Table S7: Average values, F test and coefficient of variation (CV) for non-exchangeable soil Ca, Mg and Ca + Mg (0.0-0.2 m) as a function of different liming and gypsum rates in soybean (2019/2020 and 2020/2021 cropping seasons) in a Cerrado area. Currais, Piauí, Brazil.

| Liming (t ha <sup>-1</sup> )       | Non-<br>exchangeable | Non-<br>exchangeable | Non-<br>exchangeable      | Non-<br>exchangeable | Non-<br>exchangeable | Non-<br>exchangeable |
|------------------------------------|----------------------|----------------------|---------------------------|----------------------|----------------------|----------------------|
|                                    | Ca                   | Mg                   | Ca + Mg                   | Ca                   | Mg                   | Ca + Mg              |
| ----- cmolc Kg <sup>-1</sup> ----- |                      |                      |                           |                      |                      |                      |
| 2019/2020 cropping season          |                      |                      | 2020/2021 cropping season |                      |                      |                      |
| 0                                  | 0.08                 | 0.05                 | 0.13                      | 0.34                 | 0.05                 | 0.39                 |
| 5                                  | 0.61                 | 0.44                 | 1.05                      | 0.67                 | 0.26                 | 0.94                 |
| 10                                 | 1.60                 | 1.08                 | 2.68                      | 0.98                 | 0.43                 | 1.41                 |
| 15                                 | 2.62                 | 1.65                 | 4.27                      | 1.52                 | 0.89                 | 2.41                 |
| 20                                 | 3.73                 | 2.52                 | 6.25                      | 2.13                 | 1.16                 | 3.30                 |
| Teste F                            | **                   | **                   | **                        | **                   | **                   | **                   |
| Gypsum (t ha <sup>-1</sup> )       |                      |                      |                           |                      |                      |                      |
| 0                                  | 1.41                 | 0.95                 | 2.35                      | 1.29                 | 0.52                 | 2.35                 |
| 1                                  | 1.62                 | 1.05                 | 2.67                      | 1.16                 | 7.72                 | 2.67                 |
| 2                                  | 1.71                 | 1.12                 | 2.83                      | 1.25                 | 0.66                 | 2.83                 |
| 4                                  | 2.18                 | 1.47                 | 3.65                      | 0.84                 | 0.37                 | 3.65                 |
| F test                             | **                   | **                   | *                         | ns                   | ns                   | ns                   |
| C x G                              | *                    | ns                   | *                         | ns                   | ns                   | ns                   |
| CV(%)                              | 36.8                 | 39.9                 | 37.1                      | 46.8                 | 45.5                 | 47.7                 |

ns, \* and \*\* - Non-significant, significant at 5 and at 1% of probability by the F test.

Table S8: Average values, F test and coefficient of variation (CV) for the concentration of macro and micronutrients in the soybean diagnostic leaf as a function of liming and gypsum rates (2019/2020 and 2020/2021 cropping seasons) in a Cerrado area. Currais, Piauí, Brazil.

|                              | N                  | P    | K    | Ca   | Mg   | S                   | B   | Cu   | Fe   | Mn   | Zn   |
|------------------------------|--------------------|------|------|------|------|---------------------|-----|------|------|------|------|
| Liming (t ha <sup>-1</sup> ) | g kg <sup>-1</sup> |      |      |      |      | mg kg <sup>-1</sup> |     |      |      |      |      |
| 2019/2020 cropping season    |                    |      |      |      |      |                     |     |      |      |      |      |
| 0                            | 39.4               | 2.9  | 19.7 | 5.4  | 4.1  | 3.7                 | 42  | 2.9  | 150  | 159  | 37   |
| 5                            | 37.1               | 2.7  | 20.3 | 6.6  | 4.7  | 3.8                 | 40  | 2.7  | 126  | 103  | 28   |
| 10                           | 37.2               | 2.8  | 21.1 | 7.6  | 4.7  | 3.1                 | 41  | 2.9  | 131  | 112  | 26   |
| 15                           | 37.3               | 2.7  | 21.6 | 7.8  | 4.8  | 3.3                 | 44  | 3.3  | 127  | 109  | 24   |
| 20                           | 35.5               | 2.4  | 21.8 | 8.2  | 4.8  | 3.8                 | 42  | 3.3  | 129  | 89   | 22   |
| F test                       | **                 | **   | **   | **   | **   | ns                  | ns  | *    | **   | **   | **   |
| Gypsum (t ha <sup>-1</sup> ) |                    |      |      |      |      |                     |     |      |      |      |      |
| 0                            | 36.9               | 2.8  | 20.4 | 7.0  | 4.7  | 2.9                 | 43  | 2.9  | 136  | 114  | 26   |
| 1                            | 37.3               | 2.7  | 20.9 | 7.0  | 4.6  | 3.2                 | 43  | 2.9  | 136  | 113  | 27   |
| 2                            | 36.9               | 2.6  | 20.2 | 7.5  | 4.8  | 3.0                 | 40  | 2.9  | 133  | 120  | 28   |
| 4                            | 38.0               | 2.7  | 22.0 | 7.1  | 4.3  | 4.4                 | 41  | 3.2  | 126  | 112  | 30   |
| F test                       | ns                 | ns   | ns   | **   | **   | **                  | ns  | ns   | ns   | ns   | **   |
| C x G                        | ns                 | ns   | ns   | ns   | ns   | ns                  | ns  | ns   | ns   | ns   | ns   |
| CV (%)                       | 4.6                | 5.1  | 6.8  | 7.9  | 7.5  | 43.4                | 9.9 | 22.2 | 10.6 | 23.2 | 8.9  |
| 2020/2021 cropping season    |                    |      |      |      |      |                     |     |      |      |      |      |
| Liming (t ha <sup>-1</sup> ) |                    |      |      |      |      |                     |     |      |      |      |      |
| 0                            | 36.8               | 3.02 | 21.9 | 5.42 | 3.47 | 1.62                | 47  | 4.2  | 164  | 74   | 36   |
| 5                            | 39.9               | 3.54 | 23.2 | 6.15 | 5.13 | 1.82                | 40  | 3.8  | 89   | 31   | 26   |
| 10                           | 40.0               | 3.92 | 25.0 | 6.42 | 5.70 | 1.88                | 41  | 3.4  | 80   | 25   | 23   |
| 15                           | 38.6               | 3.94 | 23.2 | 6.54 | 5.50 | 1.64                | 40  | 3.2  | 68   | 24   | 23   |
| 20                           | 38.0               | 4.38 | 23.2 | 6.82 | 6.05 | 1.71                | 41  | 4.7  | 81   | 22   | 21   |
| F test                       | **                 | **   | **   | **   | **   | ns                  | ns  | ns   | **   | **   | **   |
| Gypsum (t ha <sup>-1</sup> ) |                    |      |      |      |      |                     |     |      |      |      |      |
| 0                            | 39.0               | 3.94 | 24.5 | 6.08 | 5.13 | 1.77                | 43  | 4.2  | 91   | 34   | 26   |
| 1                            | 39.4               | 3.66 | 23.6 | 6.21 | 5.03 | 1.69                | 43  | 3.9  | 101  | 36   | 24   |
| 2                            | 38.2               | 3.67 | 22.3 | 6.54 | 5.52 | 1.68                | 42  | 3.9  | 103  | 34   | 24   |
| 4                            | 38.2               | 3.77 | 23.0 | 6.25 | 5.00 | 1.84                | 40  | 3.5  | 92   | 38   | 29   |
| F test                       | ns                 | ns   | **   | ns   | ns   | ns                  | **  | ns   | ns   | ns   | ns   |
| C x G                        | ns                 | ns   | ns   | ns   | ns   | ns                  | ns  | ns   | ns   | ns   | ns   |
| CV (%)                       | 6.0                | 15.2 | 7.5  | 14.6 | 17.1 | 17.6                | 6.8 | 38.4 | 30.7 | 15.2 | 10.9 |

ns, \* and \*\* - Non-significant, significant at 5 and at 1% of probability by the F test.



Table S9: Average values, F test and coefficient of variation (CV) for the soybean grain yield as a function of liming and gypsum rates (2019/2020 and 2020/2021 cropping seasons) in a Cerrado area. Currais, Piauí, Brazil.

| Liming<br>t ha <sup>-1</sup> | Grain yield (kg ha <sup>-1</sup> ) |           |
|------------------------------|------------------------------------|-----------|
|                              | 2019/2020                          | 2020/2021 |
| 0                            | 971                                | 557       |
| 5                            | 1916                               | 1788      |
| 10                           | 2275                               | 2063      |
| 15                           | 2375                               | 1956      |
| 20                           | 2298                               | 2054      |
| F test                       | **                                 | **        |
| Gypsum (t ha <sup>-1</sup> ) |                                    |           |
| 0                            | 2008                               | 1669      |
| 1                            | 1868                               | 1649      |
| 2                            | 1945                               | 1728      |
| 4                            | 2048                               | 1638      |
| F test                       | ns                                 | ns        |
| C x G                        | ns                                 | ns        |
| CV(%)                        | 12.8                               | 10.9      |

ns, \* and \*\* - Non-significant, significant at 5 and at 1% of probability by the F test.

Table S10: Average values (%) of residual limestone (non-exchangeable Ca and Mg) as a function of liming and gypsum rates in soybean at the 0.0-0.2 m soil layer in a Cerrado area. Currais, Piauí, Brazil.

| Liming                       | Residual limestone (%) |           |
|------------------------------|------------------------|-----------|
| t ha <sup>-1</sup>           | 2019/2020              | 2020/2021 |
| 5                            | 51                     | 28        |
| 10                           | 61                     | 33        |
| 15                           | 67                     | 47        |
| 20                           | 74                     | 53        |
| Gypsum (t ha <sup>-1</sup> ) |                        |           |
| 0                            | 61                     | 43        |
| 1                            | 63                     | 42        |
| 2                            | 63                     | 41        |
| 4                            | 65                     | 35        |
